# Supplementary material
Source: publisher figshare collection journal article supplement (https://acs.figshare.com/ndownloader/files/4393192)
Supplement: Supplementary file 1 [file 4393192]

## Supporting Information

### **Supramolecular Architectures and Hydrogen-Bond Directionalities of 4,4'-Biimidazole Metal Complexes Depending on Coordination Geometries**

Tsuyoshi Murata, Yumi Yakiyama, Kazuhiro Nakasuji, and Yasushi Moita

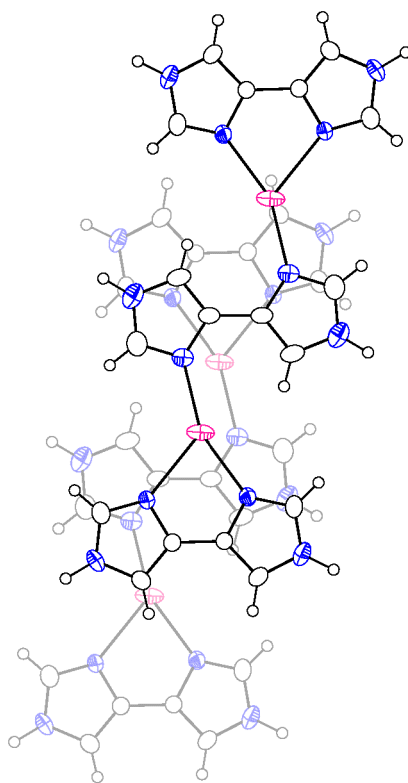

**Figure S1.** Overlap patterns in the crystal structure of **1**.

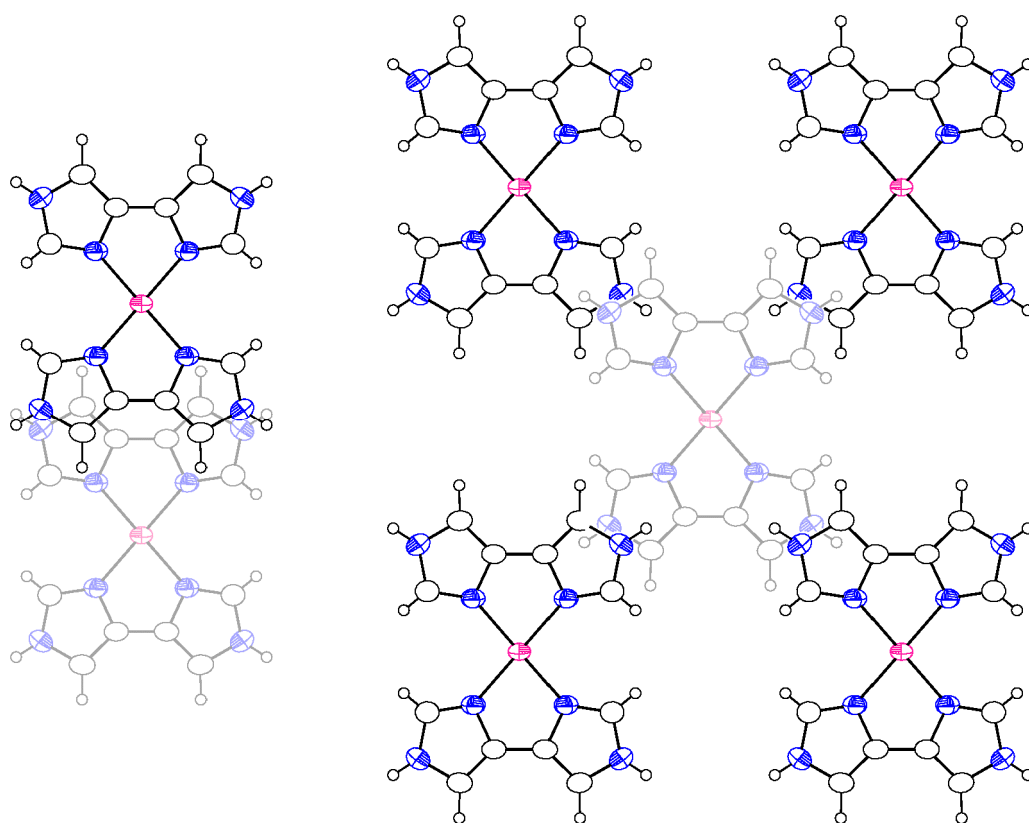

**Figure S2.** Overlap patterns in the crystal structure of **2**.

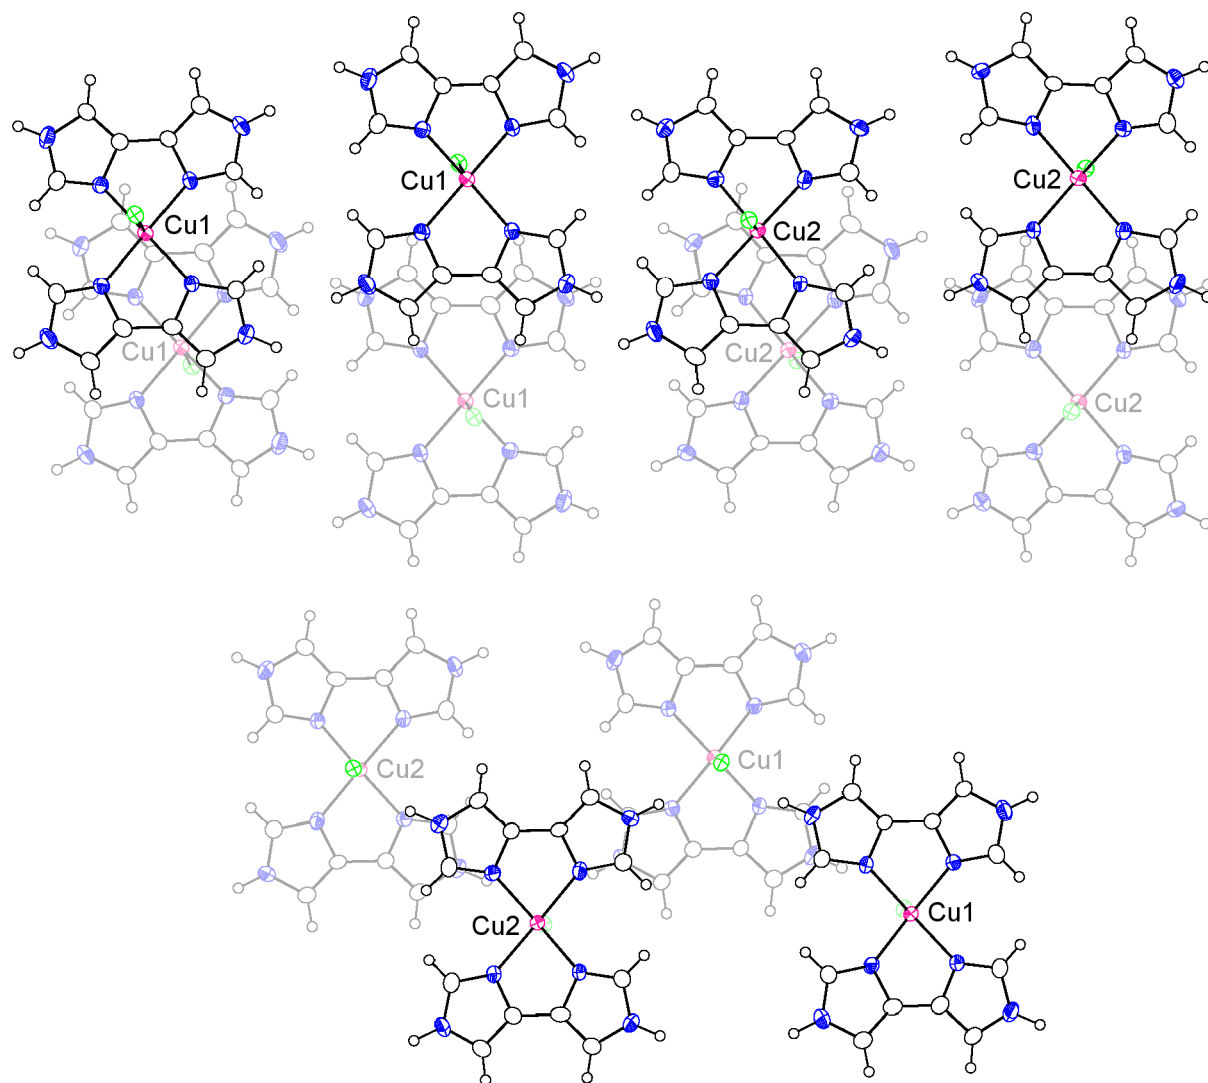

**Figure S3.** Overlap patterns in the crystal structure of **3**.

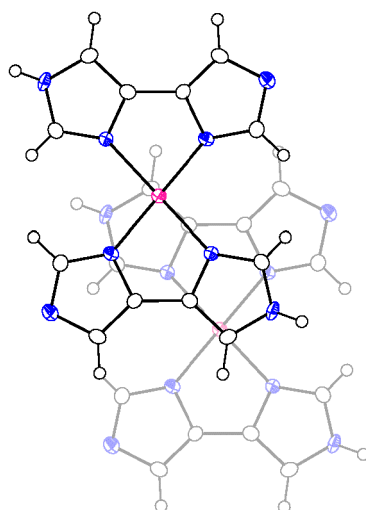

**Figure S4.** Overlap patterns in the crystal structure of **4**.

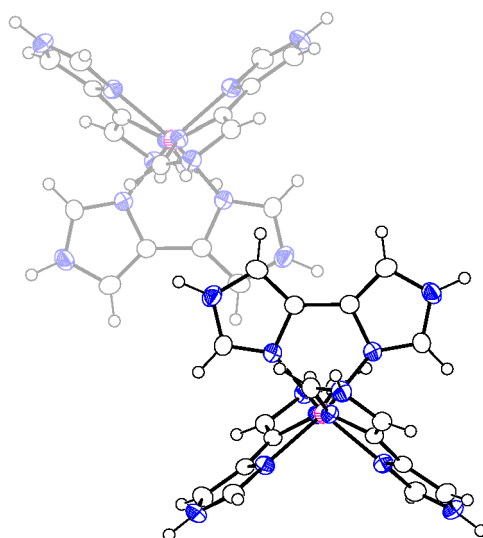

**Figure S5.** Overlap patterns in the crystal structure of **5**.

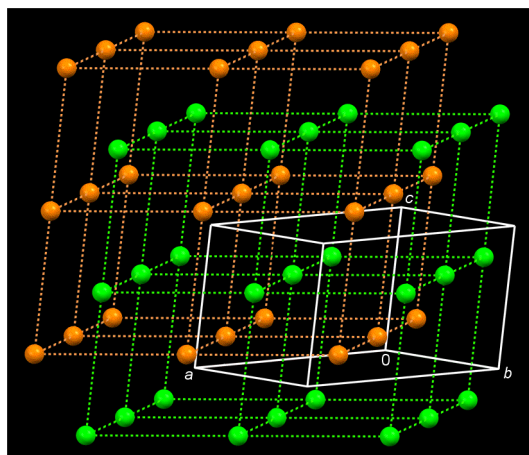

**Figure S6.** Schematic drawing of the interpenetrated network of **5**. Green and orange spheres are  $\text{Ni}^{\text{II}}$  centers of the  $\Delta$  and  $\Lambda$  isomers, respectively. Dotted lines represent the distances between  $\text{Ni}^{\text{II}}$  centers connected by H-bonds.
